# Supplementary material for: Noise reduction in single time frame optical DNA maps
Source: PubMed Central journal article supplement (PMC5480869; doi:10.1371/journal.pone.0179041), 2017-06-22
Supplement: pone.0179041.s001.pdf [file pone.0179041.s001.pdf]

## S1 Table

| Type of barcode | Properties of the barcodes |                            |                          |                               |                                 |                                          |
|-----------------|----------------------------|----------------------------|--------------------------|-------------------------------|---------------------------------|------------------------------------------|
|                 | $\langle I_s \rangle$      | $\langle \sigma_s \rangle$ | $\langle I_{bg} \rangle$ | $\langle \sigma_{bg} \rangle$ | $\langle \text{length} \rangle$ | $\langle \sigma_{\text{length}} \rangle$ |
| <i>pUUH</i>     | 931 ( $\pm 29$ )           | 47                         | 731                      | 7                             | 348                             | 6                                        |
| <i>pEC005A</i>  | 1300 ( $\pm 111$ )         | 71                         | 789                      | 9                             | 115                             | 4                                        |
| <i>pEC005B</i>  | 1244 ( $\pm 119$ )         | 63                         | 785                      | 8                             | 235                             | 3                                        |
