# Supplementary material for: Noise reduction in single time frame optical DNA maps
Source: PubMed Central journal article supplement (PMC5480869; doi:10.1371/journal.pone.0179041), 2017-06-22
Supplement: pone.0179041.s002.pdf [file pone.0179041.s002.pdf]

## S2 Table

| Type of barcode | $\langle \Delta \tilde{C} \rangle = \langle \tilde{C}_{fst,ta} - \tilde{C}_{ust,ta} \rangle$ | $\sigma_{\tilde{C}_{fst,ta} - \tilde{C}_{ust,ta}}$ |
|-----------------|----------------------------------------------------------------------------------------------|----------------------------------------------------|
| <i>pUUH</i>     | 0.23                                                                                         | 0.06                                               |
| <i>pEC005A</i>  | 0.15                                                                                         | 0.05                                               |
| <i>pEC005B</i>  | 0.15                                                                                         | 0.04                                               |
